# Supplementary material for: A series of NiII-flavonolate complexes as structural and functional ES (enzyme-substrate) models of the NiII-containing quercetin 2,3-dioxygenase
Source: Royal Society of Chemistry journal article supplement (doi:10.1039/c3dt53349b), 2014-01-01
Supplement: c3dt53349b1.pdf [file c3dt53349b1.pdf]

## Supporting Information

For

# A Series of Ni<sup>II</sup>-Flavonolate Complexes as Structural and Functional ES (Enzyme-Substrate) Models of the Ni<sup>II</sup>-Containing Quercetin 2,3-Dioxygenase

*Ying-Ji Sun\* and Qian-Qian Huang and Jian-Jun Zhang*

yingjis@dlut.edu.cn

## Table of Contents

### Table Caption

**Table S1.** The solution FT-IR results of the complexes  $[\text{Ni}^{\text{II}}\text{L}^{\text{R}}(\text{fla})]$  in ethanol.

**Table S2.** The reaction products analysis results of the complexes  $[\text{Ni}^{\text{II}}\text{L}^{\text{R}}(\text{fla})]$  with  $\text{O}_2$ .

**Table S3.** Kinetic results of the complexes  $[\text{Ni}^{\text{II}}\text{L}^{\text{R}}(\text{fla})]$ .

### Figure Caption

**Figure S1.** The FT-IR spectra of the ethanol solution and solid sample of  $[\text{Ni}^{\text{II}}\text{L}^{\text{Me}}(\text{fla})]$  (**2**). (A) solvent ethanol (B) ethanol solution of  $[\text{Ni}^{\text{II}}\text{L}^{\text{Me}}(\text{fla})]$  (**2**) (C) solid sample of  $[\text{Ni}^{\text{II}}\text{L}^{\text{Me}}(\text{fla})]$  (**2**).

**Figure S2.** The HPLC-MS spectra of the reaction products of  $[\text{Ni}^{\text{II}}\text{L}^{\text{NO}_2}(\text{fla})]$  (**5**) with  $\text{O}_2$  at  $70\text{ }^\circ\text{C}$  for 8 h. (a) HPLC spectra; MS spectra of (b) salicylic acid  $m/z$  (neg.):  $137.0 (\text{M} - \text{H})^-$ ; (c) benzoic acid  $m/z$  (neg.):  $120.9 (\text{M} - \text{H})^-$ ,  $180.9 (\text{M} + \text{OAc})^-$ ; (d) 2-hydroxy-*N,N*-dimethyl benzamide  $m/z$  (pos.):  $166.1 (\text{M} + \text{H})^+$ ; (e) *N,N*-dimethyl benzamide  $m/z$  (pos.):  $150.0 (\text{M} + \text{H})^+$ .

**Figure S3.** Eyring plot for the dioxygenation of the complexes  $[\text{Ni}^{\text{II}}\text{L}^{\text{R}}(\text{fla})]$  ( $1.0 \times 10^{-4}$  M) in DMF.

**Table S1.** The solution FT-IR results of the complexes  $[\text{Ni}^{\text{II}}\text{L}^{\text{R}}(\text{fla})]$  in ethanol.

|                                                 | $[\text{Ni}^{\text{II}}\text{L}^{\text{OMe}}(\text{fla})]$ ( <b>1</b> ) | $[\text{Ni}^{\text{II}}\text{L}^{\text{Me}}(\text{fla})]$ ( <b>2</b> ) | $[\text{Ni}^{\text{II}}\text{L}^{\text{Br}}(\text{fla})]$ ( <b>4</b> ) | $[\text{Ni}^{\text{II}}\text{L}^{\text{NO}_2}(\text{fla})]$ ( <b>5</b> ) |
|-------------------------------------------------|-------------------------------------------------------------------------|------------------------------------------------------------------------|------------------------------------------------------------------------|--------------------------------------------------------------------------|
| $\nu(\text{CO}) / \text{cm}^{-1}$               | 1549                                                                    | 1548                                                                   | 1544                                                                   | 1552                                                                     |
| $\nu_{\text{as}}(\text{CO}_2) / \text{cm}^{-1}$ | 1614                                                                    | 1614                                                                   | 1614                                                                   | 1607                                                                     |
| $\nu_{\text{s}}(\text{CO}_2) / \text{cm}^{-1}$  | 1416                                                                    | 1418                                                                   | 1424                                                                   | 1414                                                                     |
| $\Delta\nu(\text{CO}_2) / \text{cm}^{-1}$       | 198                                                                     | 196                                                                    | 190                                                                    | 193                                                                      |

**Table S2.** The reaction products analysis results of the complexes [Ni<sup>II</sup>L<sup>R</sup>(fla)] with O<sub>2</sub>.

| Complex                                                           | Yield (%)      |              |                                           |                                | Conv. (%) |
|-------------------------------------------------------------------|----------------|--------------|-------------------------------------------|--------------------------------|-----------|
|                                                                   | Salicylic acid | Benzoic acid | 2-Hydroxy- <i>N,N</i> -dimethyl benzamide | <i>N,N</i> -dimethyl benzamide |           |
| [Ni <sup>II</sup> L <sup>OMe</sup> (fla)] ( <b>1</b> )            | 93.9           | 78.1         | —                                         | 14.2                           | 93.9      |
| [Ni <sup>II</sup> L <sup>Me</sup> (fla)] ( <b>2</b> )             | 34.6           | 23.9         | 57.3                                      | 66.5                           | 91.9      |
| [Ni <sup>II</sup> L <sup>Br</sup> (fla)] ( <b>4</b> )             | 14.6           | 57.2         | 69.2                                      | 26.6                           | 83.8      |
| [Ni <sup>II</sup> L <sup>NO<sub>2</sub></sup> (fla)] ( <b>5</b> ) | 25.2           | 45.4         | 50.4                                      | 31.8                           | 77.2      |

**Table S3.** Kinetic results of the model complexes  $[\text{Ni}^{\text{II}}\text{L}^{\text{R}}(\text{fla})]$ . **$[\text{Ni}^{\text{II}}\text{L}^{\text{OMe}}(\text{fla})]$  (1)**

|    | T<br>(°C) | $10^4[\text{Ni}^{\text{II}}\text{L}^{\text{OMe}}(\text{fla})]_0$<br>(M) | $10^3[\text{O}_2]_0$<br>(M) | $10^8\nu$<br>(M s <sup>-1</sup> ) | $10k$<br>(M <sup>-1</sup> s <sup>-1</sup> ) | $10k$<br>(M <sup>-1</sup> s <sup>-1</sup> ) |
|----|-----------|-------------------------------------------------------------------------|-----------------------------|-----------------------------------|---------------------------------------------|---------------------------------------------|
| 1  | 70        | 0.80                                                                    | 4.02                        | 10.7                              | $3.34 \pm 0.08$                             | $3.55 \pm 0.16$                             |
| 2  | 70        | 0.94                                                                    | 4.02                        | 13.3                              | $3.51 \pm 0.09$                             |                                             |
| 3  | 70        | 1.06                                                                    | 4.02                        | 14.3                              | $3.35 \pm 0.10$                             |                                             |
| 4  | 70        | 1.18                                                                    | 4.02                        | 18.2                              | $3.83 \pm 0.04$                             |                                             |
|    |           |                                                                         |                             |                                   |                                             |                                             |
| 5  | 65        | 0.89                                                                    | 2.79                        | 6.85                              | $2.76 \pm 0.07$                             | $2.80 \pm 0.10$                             |
| 6  | 65        | 0.89                                                                    | 4.13                        | 9.97                              | $2.71 \pm 0.05$                             |                                             |
| 7  | 65        | 0.89                                                                    | 4.99                        | 12.1                              | $2.72 \pm 0.12$                             |                                             |
| 8  | 65        | 0.80                                                                    | 5.85                        | 14.0                              | $3.00 \pm 0.14$                             |                                             |
|    |           |                                                                         |                             |                                   |                                             |                                             |
| 9  | 75        | 0.98                                                                    | 3.90                        | 19.7                              | $5.15 \pm 0.03$                             |                                             |
| 10 | 80        | 0.99                                                                    | 3.79                        | 30.9                              | $8.24 \pm 0.07$                             |                                             |

 **$[\text{Ni}^{\text{II}}\text{L}^{\text{Me}}(\text{fla})]$  (2)**

|    | T<br>(°C) | $10^4[\text{Ni}^{\text{II}}\text{L}^{\text{Me}}(\text{fla})]_0$<br>(M) | $10^3[\text{O}_2]_0$<br>(M) | $10^8\nu$<br>(M s <sup>-1</sup> ) | $10^2k$<br>(M <sup>-1</sup> s <sup>-1</sup> ) | $10^2k$<br>(M <sup>-1</sup> s <sup>-1</sup> ) |
|----|-----------|------------------------------------------------------------------------|-----------------------------|-----------------------------------|-----------------------------------------------|-----------------------------------------------|
| 1  | 70        | 0.68                                                                   | 4.02                        | 2.42                              | $8.85 \pm 0.02$                               | $8.51 \pm 0.06$                               |
| 2  | 70        | 0.82                                                                   | 4.02                        | 2.73                              | $8.28 \pm 0.08$                               |                                               |
| 3  | 70        | 0.90                                                                   | 4.02                        | 2.99                              | $8.26 \pm 0.09$                               |                                               |
| 4  | 70        | 1.00                                                                   | 4.02                        | 3.49                              | $8.68 \pm 0.10$                               |                                               |
|    |           |                                                                        |                             |                                   |                                               |                                               |
| 5  | 75        | 0.99                                                                   | 4.68                        | 5.92                              | $12.8 \pm 0.05$                               | $12.5 \pm 0.10$                               |
| 6  | 75        | 0.93                                                                   | 5.46                        | 6.39                              | $12.6 \pm 0.07$                               |                                               |
| 7  | 75        | 0.91                                                                   | 3.90                        | 4.33                              | $12.2 \pm 0.06$                               |                                               |
|    |           |                                                                        |                             |                                   |                                               |                                               |
| 9  | 80        | 1.01                                                                   | 3.79                        | 7.60                              | $19.9 \pm 0.04$                               |                                               |
| 10 | 85        | 1.00                                                                   | 3.63                        | 9.57                              | $26.4 \pm 0.04$                               |                                               |

**[Ni<sup>II</sup>L<sup>Br</sup>(fla)] (4)**

|   | T<br>(°C) | 10 <sup>4</sup> [Ni <sup>II</sup> L <sup>Br</sup> (fla)] <sub>0</sub><br>(M) | 10 <sup>3</sup> [O <sub>2</sub> ] <sub>0</sub><br>(M) | 10 <sup>8</sup> v<br>(M s <sup>-1</sup> ) | 10 <sup>2</sup> k<br>(M <sup>-1</sup> s <sup>-1</sup> ) | 10 <sup>2</sup> k<br>(M <sup>-1</sup> s <sup>-1</sup> ) |
|---|-----------|------------------------------------------------------------------------------|-------------------------------------------------------|-------------------------------------------|---------------------------------------------------------|---------------------------------------------------------|
| 1 | 70        | 0.79                                                                         | 4.02                                                  | 1.61                                      | 5.07 ± 0.07                                             | 5.03 ± 0.07                                             |
| 2 | 70        | 0.92                                                                         | 4.02                                                  | 1.87                                      | 5.06 ± 0.09                                             |                                                         |
| 3 | 70        | 1.08                                                                         | 4.02                                                  | 2.18                                      | 5.02 ± 0.11                                             |                                                         |
| 4 | 70        | 1.20                                                                         | 4.02                                                  | 2.41                                      | 5.00 ± 0.09                                             |                                                         |
|   |           |                                                                              |                                                       |                                           |                                                         |                                                         |
| 5 | 75        | 1.00                                                                         | 4.68                                                  | 3.70                                      | 7.91 ± 0.10                                             | 7.85 ± 0.09                                             |
| 6 | 75        | 1.04                                                                         | 5.46                                                  | 4.41                                      | 7.77 ± 0.05                                             |                                                         |
| 7 | 75        | 1.00                                                                         | 3.90                                                  | 3.06                                      | 7.86 ± 0.13                                             |                                                         |
|   |           |                                                                              |                                                       |                                           |                                                         |                                                         |
| 8 | 80        | 1.01                                                                         | 3.79                                                  | 4.64                                      | 12.1 ± 0.11                                             |                                                         |
| 9 | 85        | 0.98                                                                         | 3.63                                                  | 6.72                                      | 18.9 ± 0.10                                             |                                                         |

**[Ni<sup>II</sup>L<sup>NO<sub>2</sub>}(fla)] (5)</sup>**

|    | T<br>(°C) | 10 <sup>4</sup> [Ni <sup>II</sup> L <sup>NO<sub>2</sub>}(fla)]<sub>0</sub><br/>(M)</sup> | 10 <sup>3</sup> [O <sub>2</sub> ] <sub>0</sub><br>(M) | 10 <sup>8</sup> v<br>(M s <sup>-1</sup> ) | 10 <sup>2</sup> k<br>(M <sup>-1</sup> s <sup>-1</sup> ) | 10 <sup>2</sup> k<br>(M <sup>-1</sup> s <sup>-1</sup> ) |
|----|-----------|------------------------------------------------------------------------------------------|-------------------------------------------------------|-------------------------------------------|---------------------------------------------------------|---------------------------------------------------------|
| 1  | 70        | 0.68                                                                                     | 4.02                                                  | 1.17                                      | 4.28 ± 0.11                                             | 4.19 ± 0.07                                             |
| 2  | 70        | 0.79                                                                                     | 4.02                                                  | 1.38                                      | 4.35 ± 0.08                                             |                                                         |
| 3  | 70        | 0.92                                                                                     | 4.02                                                  | 1.52                                      | 4.11 ± 0.09                                             |                                                         |
| 4  | 70        | 1.02                                                                                     | 4.02                                                  | 1.67                                      | 4.07 ± 0.10                                             |                                                         |
| 5  | 70        | 1.11                                                                                     | 4.02                                                  | 1.85                                      | 4.15 ± 0.12                                             |                                                         |
|    |           |                                                                                          |                                                       |                                           |                                                         |                                                         |
| 6  | 75        | 0.99                                                                                     | 4.68                                                  | 3.17                                      | 6.85 ± 0.09                                             | 6.83 ± 0.07                                             |
| 7  | 75        | 0.93                                                                                     | 5.46                                                  | 3.43                                      | 6.75 ± 0.11                                             |                                                         |
| 8  | 75        | 0.80                                                                                     | 6.24                                                  | 3.41                                      | 6.85 ± 0.07                                             |                                                         |
| 9  | 75        | 0.98                                                                                     | 3.90                                                  | 2.61                                      | 6.85 ± 0.06                                             |                                                         |
|    |           |                                                                                          |                                                       |                                           |                                                         |                                                         |
| 10 | 80        | 1.01                                                                                     | 3.79                                                  | 3.72                                      | 9.73 ± 0.07                                             |                                                         |
| 11 | 85        | 0.99                                                                                     | 3.63                                                  | 5.87                                      | 16.3 ± 0.10                                             |                                                         |

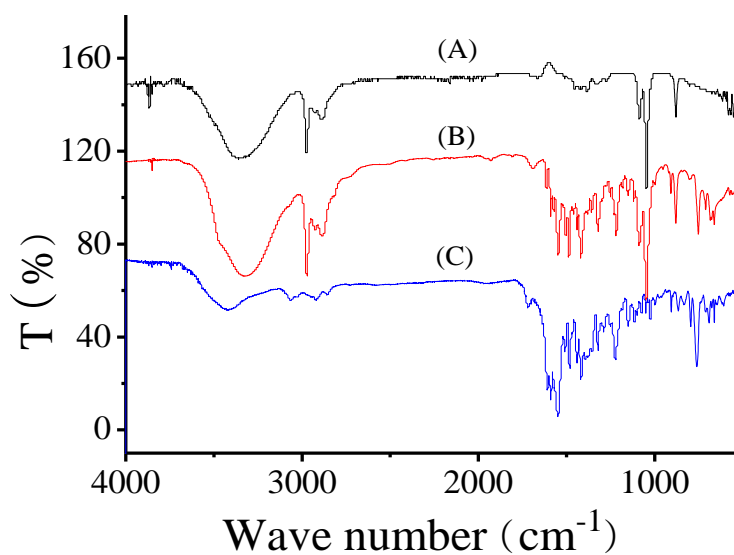

**Figure S1.** The FT-IR spectra of the ethanol solution and solid sample of  $[\text{Ni}^{\text{II}}\text{L}^{\text{Me}}(\text{fla})]$  (**2**). (A) solvent ethanol (B) ethanol solution of  $[\text{Ni}^{\text{II}}\text{L}^{\text{Me}}(\text{fla})]$  (**2**) (C) solid sample of  $[\text{Ni}^{\text{II}}\text{L}^{\text{Me}}(\text{fla})]$  (**2**).

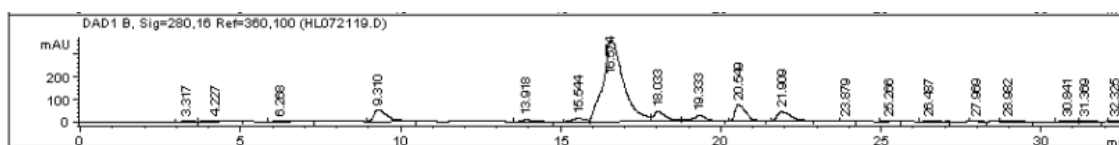

(a)

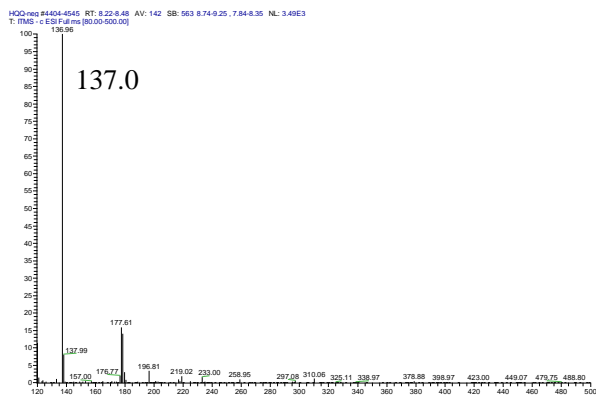

(b)

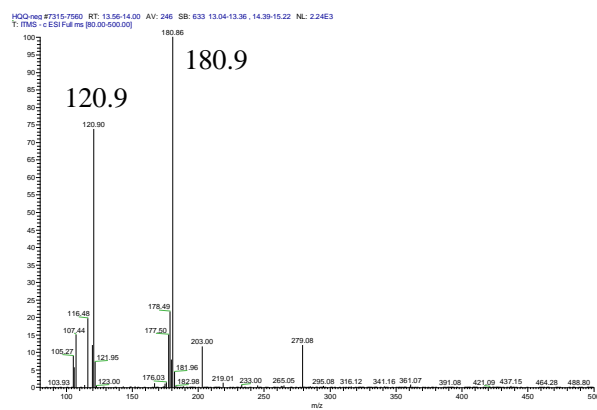

(c)

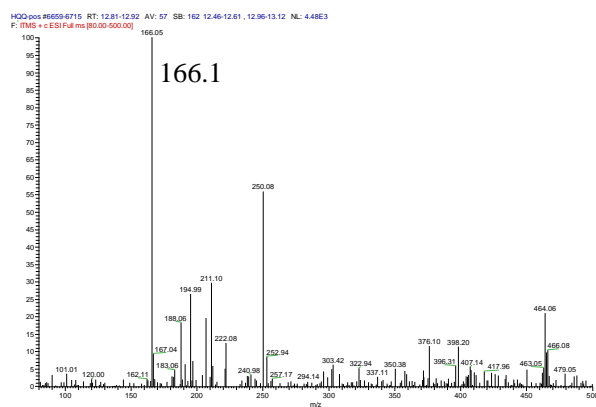

(d)

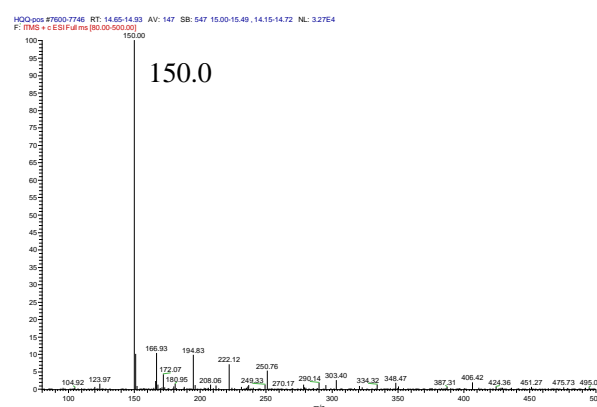

(e)

**Figure S2.** The HPLC-MS spectra of the reaction products of  $[\text{Ni}^{\text{II}}\text{L}^{\text{NO}_2}(\text{fla})]$  (**5**) with  $\text{O}_2$  at  $70^\circ\text{C}$  for 8 h. (a) HPLC spectra; MS spectra of (b) salicylic acid  $m/z$  (neg.): 137.0 ( $\text{M} - \text{H}$ )<sup>-</sup>; (c) benzoic acid  $m/z$  (neg.): 120.9 ( $\text{M} - \text{H}$ )<sup>-</sup>, 180.9 ( $\text{M} + \text{OAc}$ )<sup>-</sup>; (d) 2-hydroxy-*N,N*-dimethyl benzamide  $m/z$  (pos.): 166.1 ( $\text{M} + \text{H}$ )<sup>+</sup>; (e) *N,N*-dimethyl benzamide  $m/z$  (pos.): 150.0 ( $\text{M} + \text{H}$ )<sup>+</sup>.



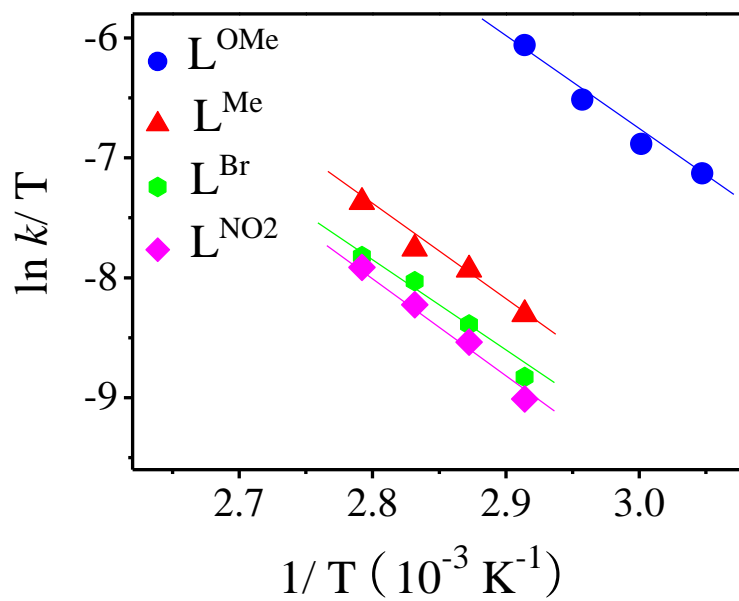

**Figure S3.** Eyring plot for the dioxygenation of the complexes  $[\text{Ni}^{\text{II}}\text{L}^{\text{R}}(\text{fla})]$  ( $1.0 \times 10^{-4}$  M) in DMF.
